# Supplementary material for: Identification of subgroup-specific miRNA patterns by epigenetic profiling of sporadic and Lynch syndrome-associated colorectal and endometrial carcinoma
Source: PubMed Central journal article supplement (PMC4357086; doi:10.1186/s13148-015-0059-3), 2015-03-10
Supplement: 13148_2015_59_MOESM4_ESM.pdf [file 13148_2015_59_MOESM4_ESM.pdf]

Supplementary Table 2. Sequences for bisulphite sequencing primers

| miRNA        | Reference  | Sequence (5' - 3')              | Product | Ta <sup>a</sup> |
|--------------|------------|---------------------------------|---------|-----------------|
| miR-572_F1   | This study | GAATTATATTTGGTAAAAAAATTAATAAGAG | 366     | 52-54           |
| miR-572_R1   | This study | CCCCRCTAATCTAAATCCCRGRAAC       |         |                 |
| miR-129-2_F2 | This study | GAAAAAAAGGGGGAATGTGAG           | 329     | 54-56           |
| miR-129-2_R2 | This study | AACCCAACCTCCACCCCTTTCCT         |         |                 |
| miR-663_F    | [1]        | GTTTGTAGAGGAATTTTTTTTAGTT       | 440     | 56-58           |
| miR-663_R    | [1]        | ACCACAACCACAAACTCAAC            |         |                 |
| miR-375_F1   | This study | GGGATTGAATAGGTAGTATAAGAGTATA    | 319     | 52-54           |
| miR-375_R1   | This study | AAACRAAAACRAAAACCCRAAACCTAA     |         |                 |
| miR-375_F2   | This study | GAGGTAGGGYGGTTTTTTAGTATTAG      | 283     | 52-54           |
| miR-375_R2   | This study | TTCCACCTCCAAAAAATTTCTATTCT      |         |                 |
| miR-345_F    | [2]        | GGTTTTGGATTGGTTGTAGAGTG         | 239     | 56-58           |
| miR-345_R    | [2]        | AACCAAAACAATCCCTTACCACTAC       |         |                 |
| miR-132_F    | This study | TGGGATTTTATTGTTTTTAAAGTGAG      | 296     | 56-58           |
| miR-132_R    | This study | CTATCCTCTAACCCCATACC            |         |                 |
| miR-34a_F    | [3]        | GGGTAYGGTGGTTTTGGGGTAGTTTG      | 250     | 64              |
| miR-34a_R1   | This study | CCTTGGGGGCTGCCCATGCTCCCCCTGTAG  |         |                 |

<sup>a</sup> Annealing temperature

[1] Lehmann U, Hasemeier B, Christgen M, Müller M, Römermann D, Länger F, Kreipe H: **Epigenetic inactivation of microRNA gene has-mir-9-1 in human breast cancer.** *J Pathol* 2008, **214**:17-24.

[2] Tang JT, Wang JL, Du W, Hong J, Zhao SL, Wang YC, Xiong H, Chen HM, Fang JY: **MicroRNA 345, a methylation-sensitive microRNA is involved in cell proliferation and invasion in human colorectal cancer.** *Carcinogenesis* 2011, **32**:1207-1215.

[3] Lodygin D, Tarasov V, Epanchintsev A, Berking C, Knyazeva T, Körner H, Knyazev P, Diebold J, Hermeking H: **Inactivation of miR-34a by aberrant CpG methylation in multiple types of cancer.** *Cell Cycle* 2008, **7**: 2591-2600.
