# Supplementary material for: Identification of subgroup-specific miRNA patterns by epigenetic profiling of sporadic and Lynch syndrome-associated colorectal and endometrial carcinoma
Source: PubMed Central journal article supplement (PMC4357086; doi:10.1186/s13148-015-0059-3), 2015-03-10
Supplement: 13148_2015_59_MOESM5_ESM.pdf [file 13148_2015_59_MOESM5_ESM.pdf]

Supplementary Table 3. Sequences for MS-MLPA probes

| miRNA  |     | MS-MLPA probes (5'-3')                                                                        | Product size (bp) | Distance of <i>Hha</i> I site to mature miRNA (bp) | GC% |
|--------|-----|-----------------------------------------------------------------------------------------------|-------------------|----------------------------------------------------|-----|
| 572    | LPO | GGGTTCCCTAAGGGTTGGA GCCCGGGCGGG <b>GC</b> GCATTAGGAGGTGT                                      | 97                | 94                                                 | 67  |
|        | RPO | CGAGGCCGTGGCCCGGAAGTGGTCGGGG TCTAGATTGGATCTTGCTGGCAC                                          |                   |                                                    | 65  |
| 129-2  | LPO | GGGTTCCCTAAGGGTTGGA CTTTACGCAG <b>GC</b> GCCTGTAGTCACGGCTGGAA                                 | 102               | 491                                                | 57  |
|        | RPO | CCTTGGCTGGGGACTCTGAGGGATAAGA TCTAGATTGGATCTTGCTGGCAC                                          |                   |                                                    | 60  |
| 663    | LPO | GGGTTCCCTAAGGGTTGGA CATCTTGAGTC CCTACTGTGGCCG <b>GC</b> GCCTCCCTTTC                           | 114               | 429                                                | 70  |
|        | RPO | CGAGTAAGGGGAGGATCCCGCCGGCAG TTCATGG TCTAGATTGGATCTTGCTGGCAC                                   |                   |                                                    | 70  |
| 375-I  | LPO | GGGTTCCCTAAGGGTTGGA CATCTTGAGTC CATCTTGAG GCGGAGGCTAGCGGG <b>GC</b> GCCTGTGCAGCACTGA          | 133               | 143                                                | 72  |
|        | RPO | GCTCGCGGAAGACCAGGACCAGGAGATCACCG TTCATGG TCTAGATTGGATCTTGCTGGCAC                              |                   |                                                    | 66  |
| 375-II | LPO | GGGTTCCCTAAGGGTTGGA CATCTTGAGTC CATCTTGAGTC CAT GCCACCGCCATCTCAACCGTACGGGTGGG                 | 139               | 135                                                | 69  |
|        | RPO | AGAGGCTGT <b>GC</b> GCCTCCAGGGGAGATC TTCATGG TTCATGG TCTAGATTGGATCTTGCTGGCAC                  |                   |                                                    | 69  |
| 345    | LPO | GGGTTCCCTAAGGGTTGGA CATCTTGAGTC CATCTTGAGTC CATCTTGAG AGGGGCC <b>GC</b> GCCTCAGGCGCTGAAGTCGGA | 152               | 573                                                | 50  |
|        | RPO | GGTGCTTGGCTTGGGTCACCAAGGTAT TTCATGG TTCATGG TTCATGG TCTAGATTGGATCTTGCTGGCAC                   |                   |                                                    | 52  |
| 132    | LPO | GGGTTCCCTAAGGGTTGGA CATCTTGAGTCCATCTTGAGTCCATCTTGA GCTACCAGCGCCCGGAGCGACACCAA                 | 158               | 3817                                               | 71  |
|        | RPO | GGTCTCGGG <b>GC</b> CCCCCGGAGGCTCCCTTT TTCATGGTTCATGGTTCATGGTTCATGG TCTAGATTGGATCTTGCTGGCAC   |                   |                                                    | 77  |
| 34a    | LPO | GGGTTCCCTAAGGGTTGGA CATCTTGAGTC CATCTTGAGTC CATCTTGAGTC CATCTTGAGTC CTGGGTGGGAGCCCTTCTCCATGG  | 165               | 31656                                              | 68  |
|        | RPO | CGGCGGGAGGTCCTCG <b>GC</b> GTGCCC TTCATGG TTCATGG TTCATGG TTCATGG TCTAGATTGGATCTTGCTGGCAC     |                   |                                                    | 80  |

LPO, left probe oligonucleotide, RPO, right probe oligonucleotide

*Hha*I site in **bold**
