# Supplementary material for: Identification of subgroup-specific miRNA patterns by epigenetic profiling of sporadic and Lynch syndrome-associated colorectal and endometrial carcinoma
Source: PubMed Central journal article supplement (PMC4357086; doi:10.1186/s13148-015-0059-3), 2015-03-10
Supplement: 13148_2015_59_MOESM6_ESM.pdf [file 13148_2015_59_MOESM6_ESM.pdf]

**Supplementary Table 4.**

Average methylation dosage ratios and standard deviations for paired tumor and normal tissues shown in Fig 3.

| Tissue category             | No. | 572              | 129-2            | 663              | 375            | 345              | 132              | 34a              |
|-----------------------------|-----|------------------|------------------|------------------|----------------|------------------|------------------|------------------|
| Sporadic Finnish CRC-MSI    | 40  | 0.56<br>(0.09)‡  | 0.36<br>(0.12)   | 0.42<br>(0.11)   | 0.04<br>(0.03) | 0.26<br>(0.16)   | 0.20<br>(0.19)   | 0.60<br>(0.16)   |
| Normal mucosa               | 40  | 0.51<br>(0.08)   | 0.16<br>(0.05)   | 0.30<br>(0.08)   | 0.04<br>(0.03) | 0.11<br>(0.04)   | 0.02<br>(0.02)   | 0.44<br>(0.14)   |
| p-value <sup>a</sup>        |     | <b>&lt;0.05</b>  | <b>&lt;0.001</b> | <b>&lt;0.001</b> | ns             | <b>&lt;0.001</b> | <b>&lt;0.001</b> | <b>&lt;0.001</b> |
| Sporadic Finnish CRC-MSS    | 47  | 0.51<br>(0.15)   | 0.30<br>(0.14)   | 0.37<br>(0.14)   | 0.04<br>(0.03) | 0.13<br>(0.07)   | 0.03<br>(0.08)   | 0.52<br>(0.16)   |
| Normal mucosa               | 47  | 0.45<br>(0.14)   | 0.15<br>(0.05)   | 0.25<br>(0.10)   | 0.05<br>(0.04) | 0.10<br>(0.05)   | 0.03<br>(0.03)   | 0.41<br>(0.13)   |
| p-value                     |     | <b>&lt;0.01</b>  | <b>&lt;0.001</b> | <b>&lt;0.001</b> | ns             | <b>&lt;0.001</b> | ns               | <b>&lt;0.001</b> |
| Finnish Lynch-CRC           | 28  | 0.60<br>(0.13)   | 0.30<br>(0.11)   | 0.41<br>(0.12)   | 0.12<br>(0.05) | 0.21<br>(0.15)   | 0.07<br>(0.04)   | 0.56<br>(0.15)   |
| Normal mucosa               |     | 0.52<br>(0.12)   | 0.20<br>(0.06)   | 0.23<br>(0.08)   | 0.13<br>(0.09) | 0.16<br>(0.07)   | 0.07<br>(0.05)   | 0.39<br>(0.16)   |
| p-value                     |     | <b>&lt;0.05</b>  | <b>&lt;0.001</b> | <b>&lt;0.001</b> | ns             | ns               | ns               | <b>&lt;0.001</b> |
| Sporadic Australian CRC-MSI | 38  | 0.63<br>(0.15)   | 0.44<br>(0.17)   | 0.53<br>(0.14)   | 0.13<br>(0.08) | 0.24<br>(0.22)   | 0.25<br>(0.22)   | 0.79<br>(0.31)   |
| Normal mucosa               |     | 0.55<br>(0.20)   | 0.22<br>(0.06)   | 0.33<br>(0.13)   | 0.10<br>(0.06) | 0.13<br>(0.06)   | 0.07<br>(0.04)   | 0.51<br>(0.30)   |
| p-value                     |     | <b>&lt;0.001</b> | <b>&lt;0.01</b>  | <b>&lt;0.001</b> | ns             | <b>&lt;0.01</b>  | <b>&lt;0.001</b> | <b>&lt;0.001</b> |
| Sporadic Australian CRC-MSS | 52  | 0.64<br>(0.11)   | 0.49<br>(0.19)   | 0.54<br>(0.12)   | 0.13<br>(0.04) | 0.15<br>(0.13)   | 0.12<br>(0.12)   | 0.75<br>(0.22)   |
| Normal mucosa               |     | 0.58<br>(0.10)   | 0.27<br>(0.06)   | 0.31<br>(0.09)   | 0.12<br>(0.05) | 0.16<br>(0.10)   | 0.11<br>(0.14)   | 0.67<br>(0.52)   |
| p-value                     |     | <b>&lt;0.05</b>  | <b>&lt;0.001</b> | <b>&lt;0.001</b> | ns             | ns               | ns               | <b>&lt;0.01</b>  |
| Finnish Lynch-EC            | 36  | 0.43<br>(0.16)   | 0.22<br>(0.10)   | 0.31<br>(0.12)   | 0.10<br>(0.06) | 0.08<br>(0.05)   | 0.12<br>(0.10)   | 0.34<br>(0.13)   |
| Normal endometrium          |     | 0.32<br>(0.12)   | 0.15<br>(0.06)   | 0.15<br>(0.11)   | 0.09<br>(0.06) | 0.09<br>(0.05)   | 0.06<br>(0.05)   | 0.22<br>(0.07)   |
| p-value                     |     | <b>&lt;0.01</b>  | <b>&lt;0.001</b> | <b>&lt;0.001</b> | ns             | ns               | <b>&lt;0.01</b>  | <b>&lt;0.001</b> |

‡Number in parentheses, standard deviation

<sup>a</sup>Statistical significance for tumor vs. normal comparisons was determined with T-test (pairwise analysis) or Wilcoxon test and significant values are in bold.

ns, non-significant
