# Supplementary material for: Identification of subgroup-specific miRNA patterns by epigenetic profiling of sporadic and Lynch syndrome-associated colorectal and endometrial carcinoma
Source: PubMed Central journal article supplement (PMC4357086; doi:10.1186/s13148-015-0059-3), 2015-03-10
Supplement: 13148_2015_59_MOESM8_ESM.pdf [file 13148_2015_59_MOESM8_ESM.pdf]

Supplementary Table 5.

Normal tissue-based threshold values for the detection of hypermethylation at miRNA loci in tumor tissues.

| Hypermethylation |               |                       |                                                     |                    |                                       |                       |  |
|------------------|---------------|-----------------------|-----------------------------------------------------|--------------------|---------------------------------------|-----------------------|--|
| miRNA            | Normal tissue |                       | Average methylation dosage ratio ( $\bar{X}_{Dm}$ ) | Standard deviation | $\bar{X}_{Dm} + 1$ standard deviation | Threshold value used‡ |  |
| 572              | colorectal    | Finnish CRCs          | 0.49                                                | 0.12               | 0.61                                  | 0.61                  |  |
|                  | colorectal    | Australian CRCs       | 0.57                                                | 0.15               | 0.72                                  | 0.72                  |  |
|                  | endometrial   | Lynch EC              | 0.32                                                | 0.12               | 0.44                                  | 0.44                  |  |
|                  | endometrial   | sporadic hyperplasias | 0.45                                                | 0.09               | 0.54                                  | 0.54                  |  |
|                  | endometrial   | Lynch hyperplasias&EC | 0.56                                                | 0.18               | 0.74                                  | 0.74                  |  |
| 129-2            | colorectal    | Finnish CRCs          | 0.16                                                | 0.06               | 0.22                                  | 0.22                  |  |
|                  | colorectal    | Australian CRCs       | 0.25                                                | 0.06               | 0.31                                  | 0.31                  |  |
|                  | endometrial   | Lynch EC              | 0.15                                                | 0.06               | 0.21                                  | 0.21                  |  |
|                  | endometrial   | sporadic hyperplasias | 0.15                                                | 0.04               | 0.19                                  | 0.19                  |  |
|                  | endometrial   | Lynch hyperplasias&EC | 0.20                                                | 0.09               | 0.29                                  | 0.29                  |  |
| 663              | colorectal    | Finnish CRCs          | 0.26                                                | 0.09               | 0.35                                  | 0.35                  |  |
|                  | colorectal    | Australian CRCs       | 0.32                                                | 0.10               | 0.42                                  | 0.42                  |  |
|                  | endometrial   | Lynch EC              | 0.15                                                | 0.11               | 0.26                                  | 0.26                  |  |
|                  | endometrial   | sporadic hyperplasias | 0.20                                                | 0.05               | 0.25                                  | 0.25                  |  |
|                  | endometrial   | Lynch hyperplasias&EC | 0.23                                                | 0.11               | 0.34                                  | 0.34                  |  |
| 375-1            | colorectal    | Finnish CRCs          | 0.07                                                | 0.06               | 0.13                                  | 0.15 <sup>a</sup>     |  |
|                  | colorectal    | Australian CRCs       | 0.11                                                | 0.05               | 0.16                                  | 0.16                  |  |
|                  | endometrial   | Lynch EC              | 0.09                                                | 0.06               | 0.15                                  | 0.15                  |  |
|                  | endometrial   | sporadic hyperplasias | 0.04                                                | 0.03               | 0.07                                  | 0.15 <sup>a</sup>     |  |
|                  | endometrial   | Lynch hyperplasias&EC | 0.12                                                | 0.06               | 0.18                                  | 0.18                  |  |
| 345              | colorectal    | Finnish CRCs          | 0.12                                                | 0.06               | 0.18                                  | 0.18                  |  |
|                  | colorectal    | Australian CRCs       | 0.15                                                | 0.08               | 0.23                                  | 0.23                  |  |
|                  | endometrial   | Lynch EC              | 0.09                                                | 0.05               | 0.14                                  | 0.15 <sup>a</sup>     |  |
|                  | endometrial   | sporadic hyperplasias | 0.04                                                | 0.03               | 0.07                                  | 0.15 <sup>a</sup>     |  |
|                  | endometrial   | Lynch hyperplasias&EC | 0.09                                                | 0.06               | 0.15                                  | 0.15                  |  |
| 132              | colorectal    | Finnish CRCs          | 0.03                                                | 0.04               | 0.07                                  | 0.15 <sup>a</sup>     |  |
|                  | colorectal    | Australian CRCs       | 0.09                                                | 0.11               | 0.20                                  | 0.20                  |  |
|                  | endometrial   | Lynch EC              | 0.06                                                | 0.05               | 0.11                                  | 0.15 <sup>a</sup>     |  |
|                  | endometrial   | sporadic hyperplasias | 0.04                                                | 0.03               | 0.07                                  | 0.15 <sup>a</sup>     |  |
|                  | endometrial   | Lynch hyperplasias&EC | 0.10                                                | 0.11               | 0.21                                  | 0.21                  |  |
| 34a              | colorectal    | Finnish CRCs          | 0.42                                                | 0.14               | 0.56                                  | 0.56                  |  |
|                  | colorectal    | Australian CRCs       | 0.56                                                | 0.28               | 0.84                                  | 0.84                  |  |
|                  | endometrial   | Lynch EC              | 0.22                                                | 0.07               | 0.29                                  | 0.29                  |  |
|                  | endometrial   | sporadic hyperplasias | 0.34                                                | 0.09               | 0.43                                  | 0.43                  |  |
|                  | endometrial   | Lynch hyperplasias&EC | 0.45                                                | 0.19               | 0.64                                  | 0.64                  |  |

‡  $\bar{X}_{Dm} + 1$  SD or technical threshold ( $Dm = 0.15$ )<sup>a</sup>, whichever was higher
